# Supplementary material for: Fully conjugated block copolymers for single-component solar cells: synthesis, purification, and characterization
Source: Royal Society of Chemistry journal article supplement (doi:10.1039/c5nj02636a), 2015-12-10
Supplement: c5nj02636a1.pdf [file c5nj02636a1.pdf]

## Supporting Information

### Fully conjugated block copolymers for single-component solar cells: synthesis, purification, and characterization†

Shifan Wang,<sup>a</sup> Qingqing Yang,<sup>b</sup> Youtian Tao,<sup>\*a</sup> Yan Guo,<sup>c</sup> Jie Yang,<sup>a</sup> Yanan Liu,<sup>a</sup> Lingyun Zhao,<sup>a</sup> Zhiyuan Xie,<sup>\*b</sup> Wei Huang<sup>\*a</sup>

<sup>a</sup>Key Laboratory of Flexible Electronics & Institute of Advanced Materials, Jiangsu National Synergistic Innovation Center for Advanced Materials (SICAM), Nanjing Tech University, 30 South Puzhu Road, Nanjing 211816, China

<sup>b</sup>Changchun Institute of Applied Chemistry, Chinese Academy of Sciences, 5625 Renmin Street, Changchun, 130022, China.

<sup>c</sup>Department of Biomedical Engineering, College of Engineering and Applied Sciences, Nanjing University, Nanjing, Jiangsu 210093, China

†Electronic Supplementary Information (ESI) available: AFM images and <sup>1</sup>H NMR spectra. See DOI: 10.1039/x0xx00000x

#### <sup>1</sup>H NMR spectra

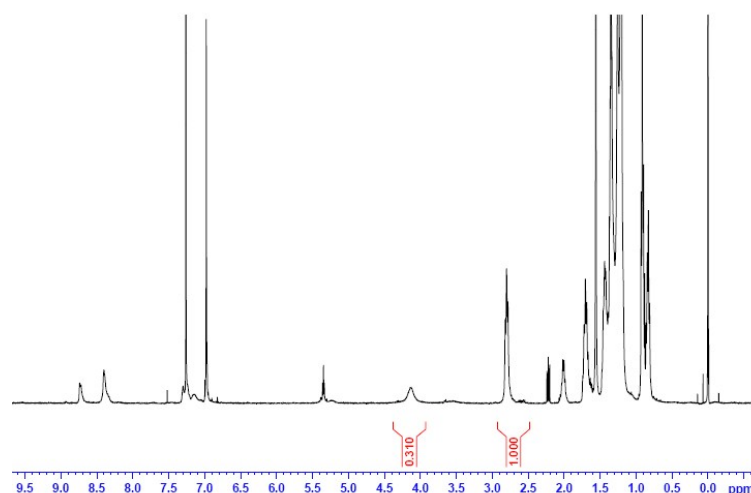

Figure S1. <sup>1</sup>H NMR spectra of BCP1-1.

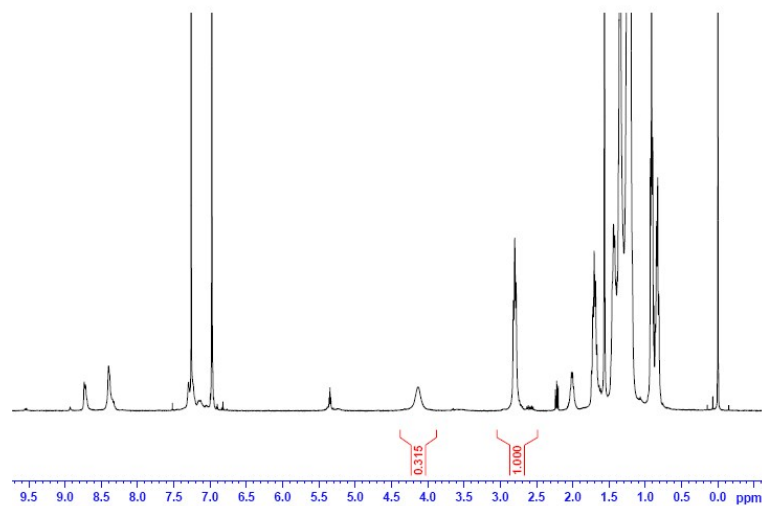

Figure S2.  $^1\text{H}$  NMR spectra of BCP1-2.

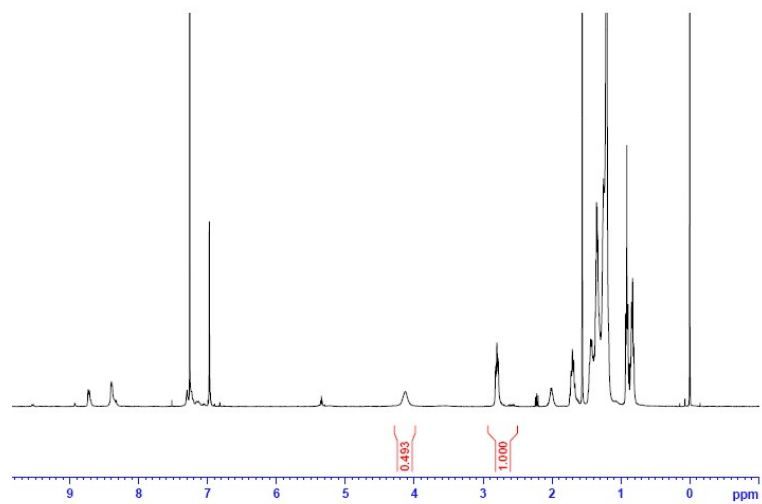

Figure S3.  $^1\text{H}$  NMR spectra of BCP1-3.

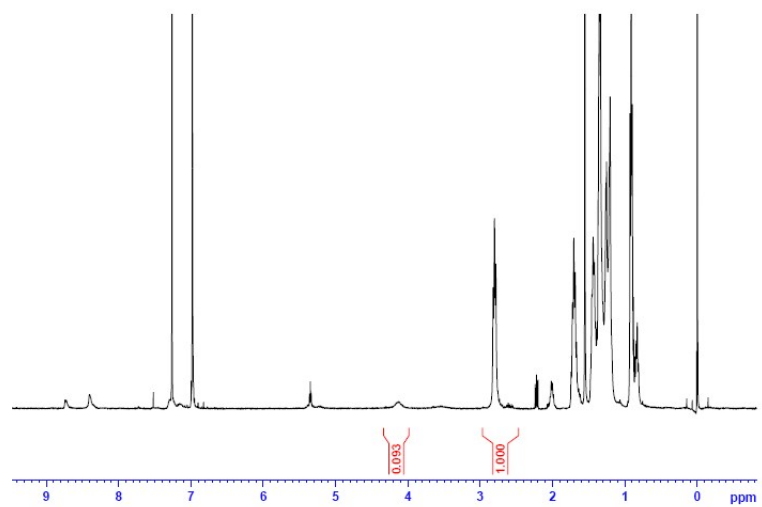

Figure S4.  $^1\text{H}$  NMR spectra of BCP2-1.

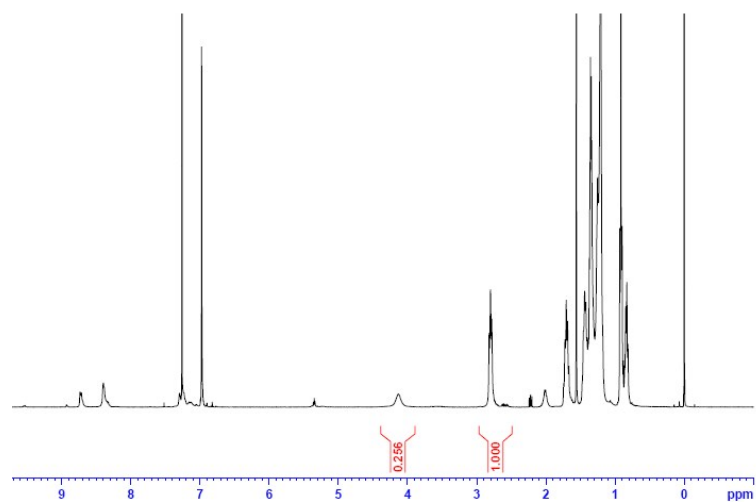

Figure S5.  $^1\text{H}$  NMR spectra of BCP2-2.

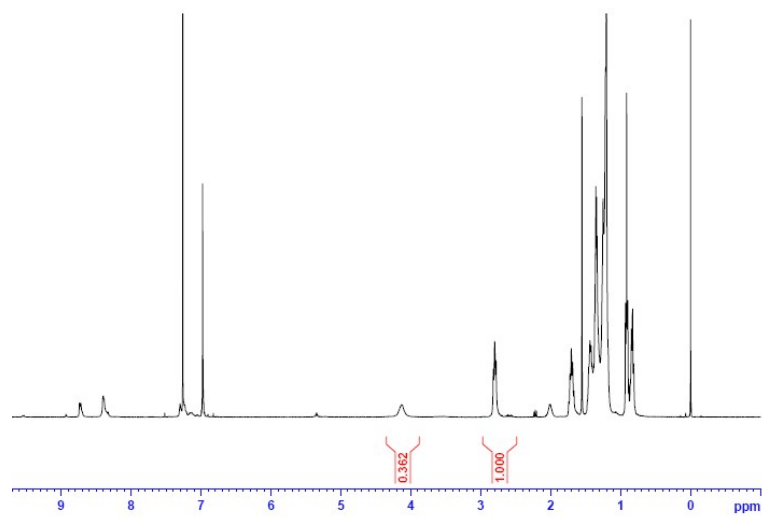

Figure S6.  $^1\text{H}$  NMR spectra of BCP2-3.

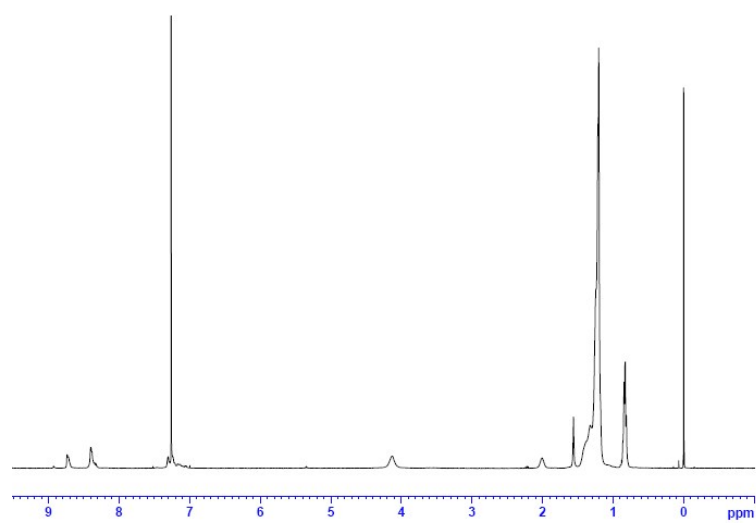

Figure S7.  $^1\text{H}$  NMR spectra of PBIT2.
